# Supplementary material for: Parallelized TCSPC for Dynamic Intravital Fluorescence Lifetime Imaging: Quantifying Neuronal Dysfunction in Neuroinflammation
Source: PubMed Central journal article supplement (PMC3629055; doi:10.1371/journal.pone.0060100), 2013-04-16

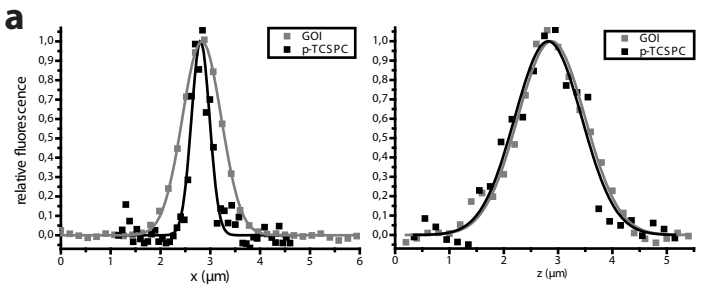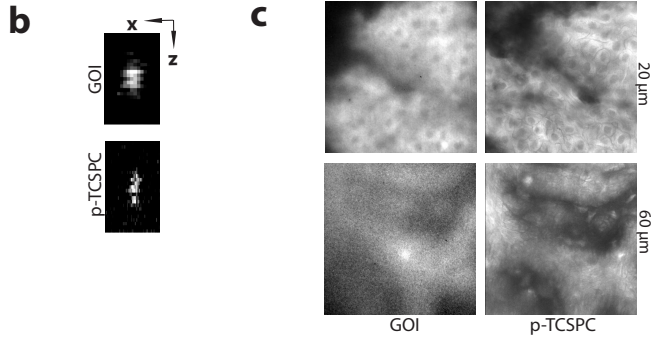

Supplement: pone.0060100.s003.pdf [file pone.0060100.s003.pdf]
