# Supplementary material for: Parallelized TCSPC for Dynamic Intravital Fluorescence Lifetime Imaging: Quantifying Neuronal Dysfunction in Neuroinflammation
Source: PubMed Central journal article supplement (PMC3629055; doi:10.1371/journal.pone.0060100), 2013-04-16

## Biexponential evaluation of the FRET signal in CerTN L15 mice (Levenberg-Marquardt)

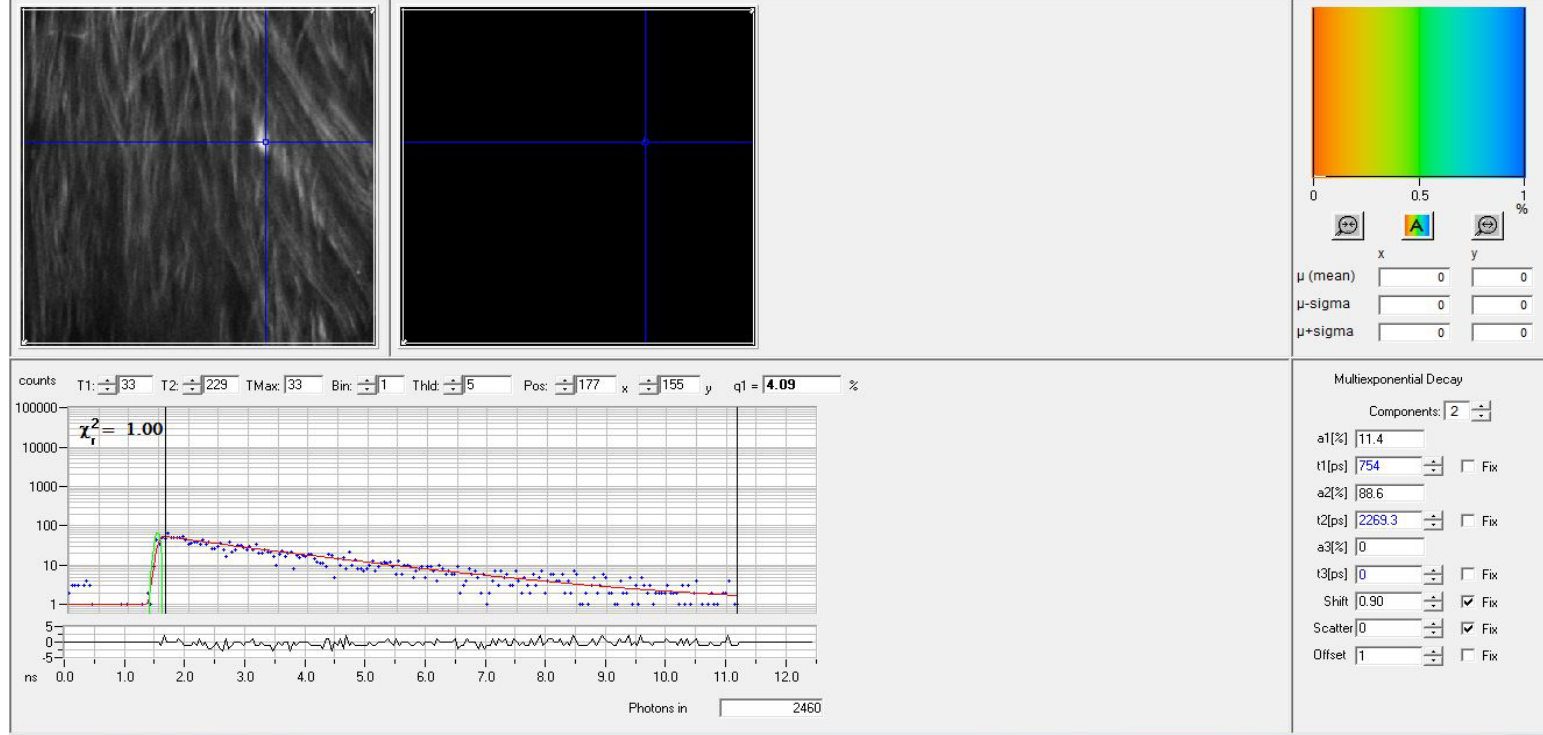

## Bilinear regressive evaluation of the FRET signal in CerTN L15 mice

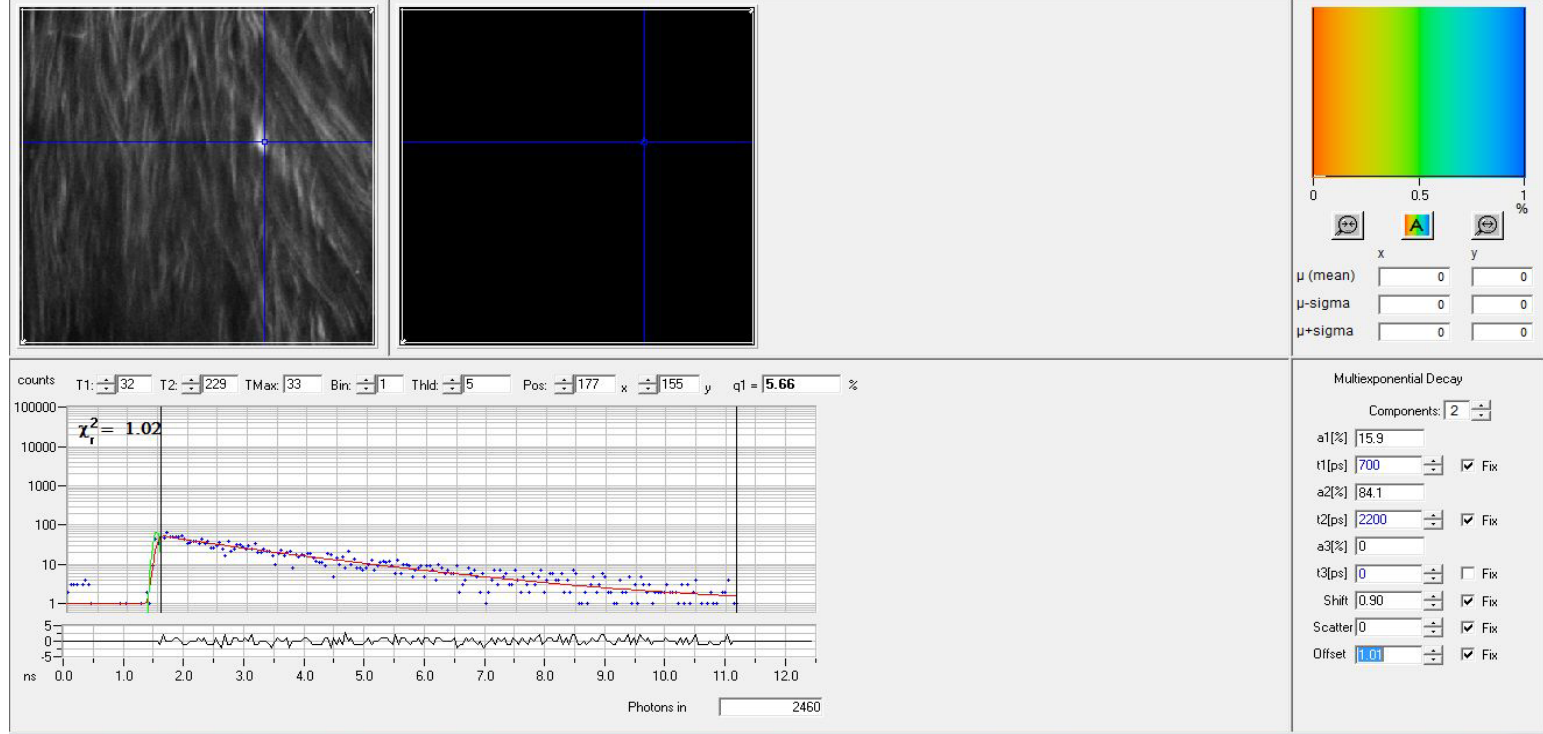

Supplement: pone.0060100.s004.pdf [file pone.0060100.s004.pdf]
